# Supplementary material for: Janus bimetallic nanorod clusters–poly(aniline) nanocomposites with temperature-responsiveness for Raman scattering-based biosensing
Source: Royal Society of Chemistry journal article supplement (doi:10.1039/d1tb00699a), 2021-01-01
Supplement: d1tb00699a1.pdf [file d1tb00699a1.pdf]

## Electronic Supporting Information (ESI)

# Janus Bimetallic Nanorod Clusters-poly(aniline) Nanocomposites with Temperature-responsiveness for Raman Scattering-based Biosensing

Eun Young Hwang, Jae Hee Lee, and Dong Woo Lim\*

Department of Bionano Engineering and Department of Bionanotechnology, Center for Bionano Intelligence Education and Research, Hanyang University, Ansan, Republic of Korea

\* Department of Bionano Engineering and Department of Bionanotechnology, Center for Bionano Intelligence Education and Research, Hanyang University, Ansan, Republic of Korea;  
Email: [dlim@hanyang.ac.kr](mailto:dlim@hanyang.ac.kr)

**Key words:** Janus nanocomposites, Bimetallic nanorod clusters, Poly(aniline), Temperature-responsiveness, Surface-enhanced Raman Scattering, Biosensing

The supporting information contains two figures to show SERS spectra of three different batches of GNRCs in SBS and ETE configuration and reversible temperature switching of SERS signals of JRCPCs with GNRCs in ETE configuration upon temperature changes. Figure S1(a) and (b) show SERS spectra of three different batches of the MGITC-encoded GNRCs in SBS and ETE configuration to examine batch-to-batch variability. Figures S2(a) and (b) show relative Raman spectra and Raman intensity of JRCPCs with GNRCs in ETE configuration

(a)

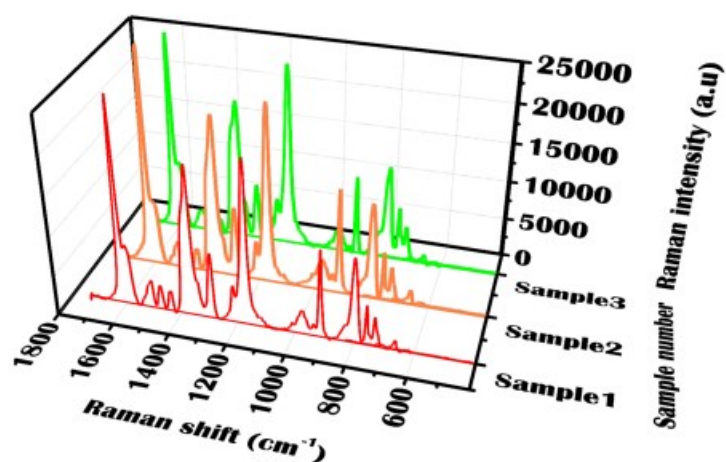

(b)

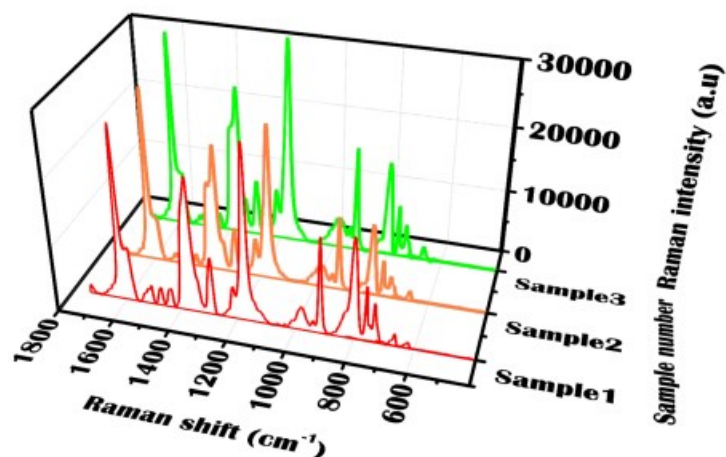

under repeated temperature changes from 25 °C to 50 °C for 3 cycles.

**Figure S1.** SERS spectra of three different batches of MGITC-encoded GNRCs in (a) SBS and

(b) ETE configuration.

S-2

(a)

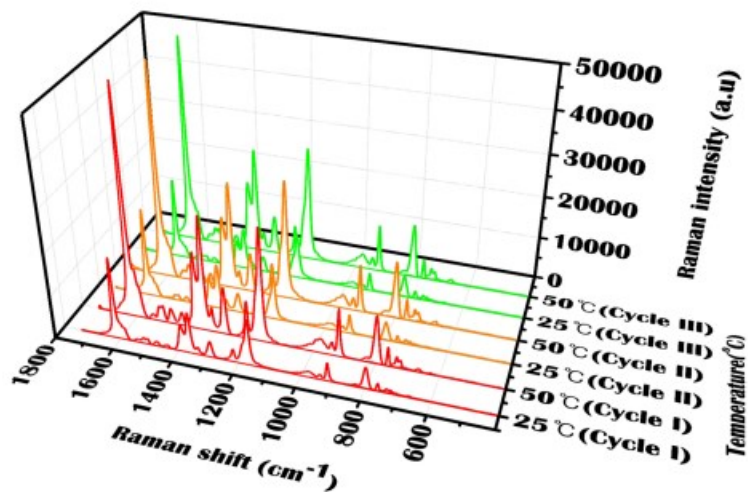

(b)

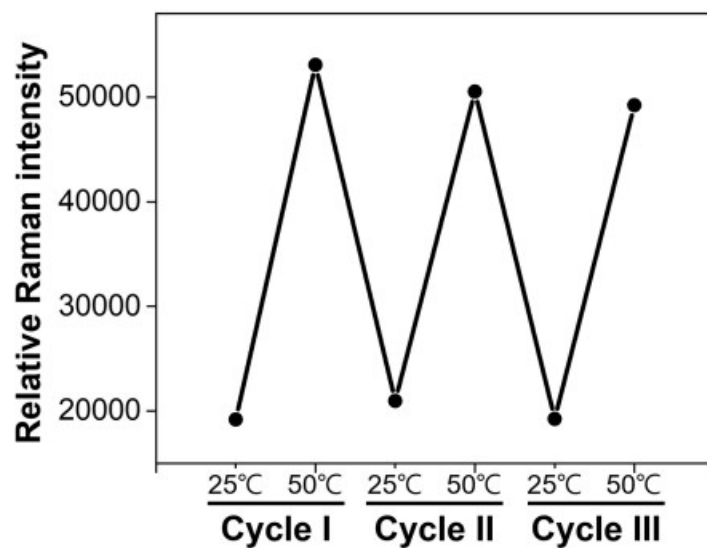

**Figure S2.** Relative Raman spectra and Raman intensity of JRCPCs with GNRCs in ETE configuration under repeated temperature changes from 25 °C to 50 °C for 3 cycles.
